# Supplementary material for: Exploration of immobilization conditions of cellulosic lyotropic liquid crystals in monomeric solvents by in situ polymerization and achievement of dual mechanochromism at room temperature
Source: Royal Society of Chemistry journal article supplement (doi:10.1039/c8ra04878a), 2018-01-01
Supplement: c8ra04878a1.pdf [file c8ra04878a1.pdf]

## Supporting Information

### **Exploration of immobilization conditions of cellulosic lyotropic liquid crystal in monomeric solvents by *in-situ* polymerization and achievement of dual mechanochromism at room temperature**

Kazuma MIYAGI,<sup>a</sup> Yoshikuni TERAMOTO<sup>\*,a,b,c</sup>

<sup>a</sup> Science of Biological Resources, The United Graduate School of Agricultural Science, Gifu University, Gifu 501-1193, Japan.

<sup>b</sup> Department of Applied Life Science, Faculty of Applied Biological Sciences, Gifu University, Gifu 501-1193, Japan.

<sup>c</sup> Center for Highly Advanced Integration of Nano and Life Sciences (G-CHAIN), Gifu University, Gifu 501-1193.

\* To whom correspondence should be addressed: [teramoto@gifu-u.ac.jp](mailto:teramoto@gifu-u.ac.jp)

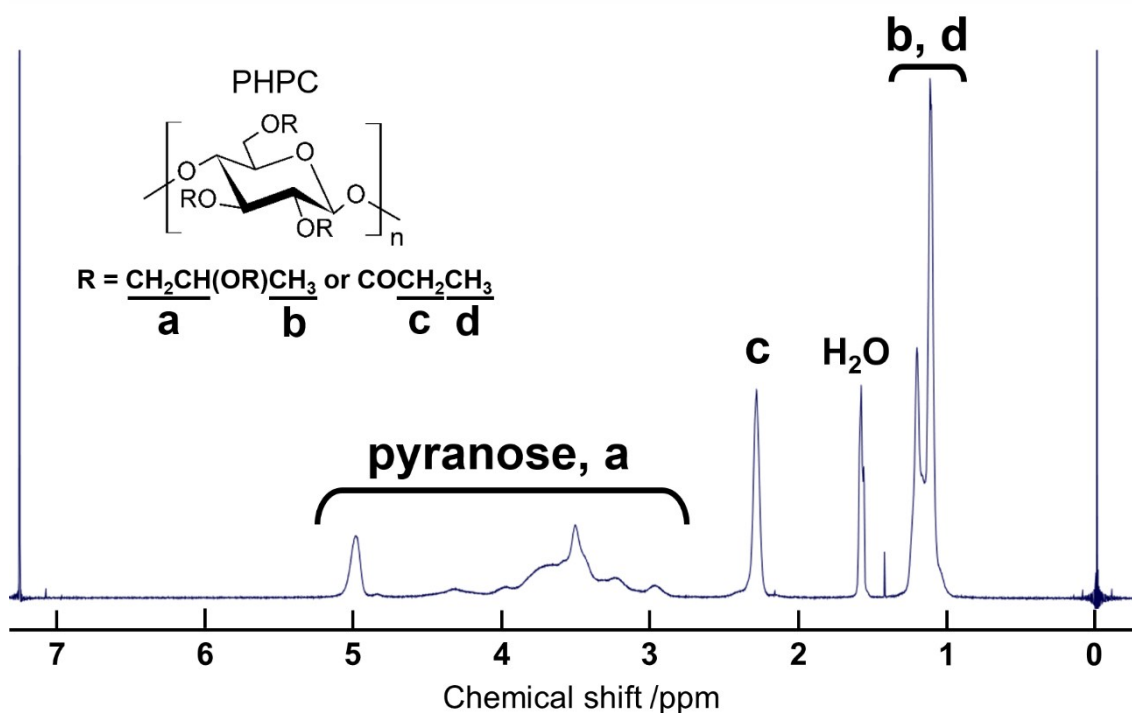

Figure S1 <sup>1</sup>H NMR spectrum of PHPC in CDCl<sub>3</sub>.

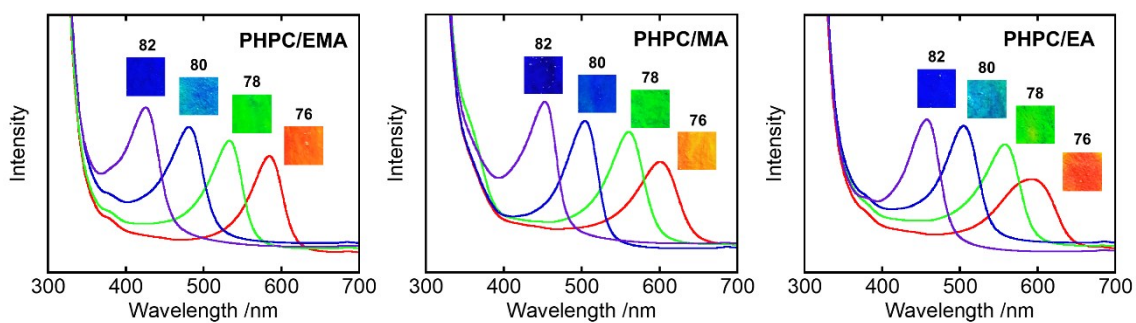

Figure S2 Visual appearances and UV-Vis spectra of PHPC/EMA, PHPC/MA, and PHPC/EA solutions. Numerals inserted represent the concentrations (wt%) of PHPC in the solutions.

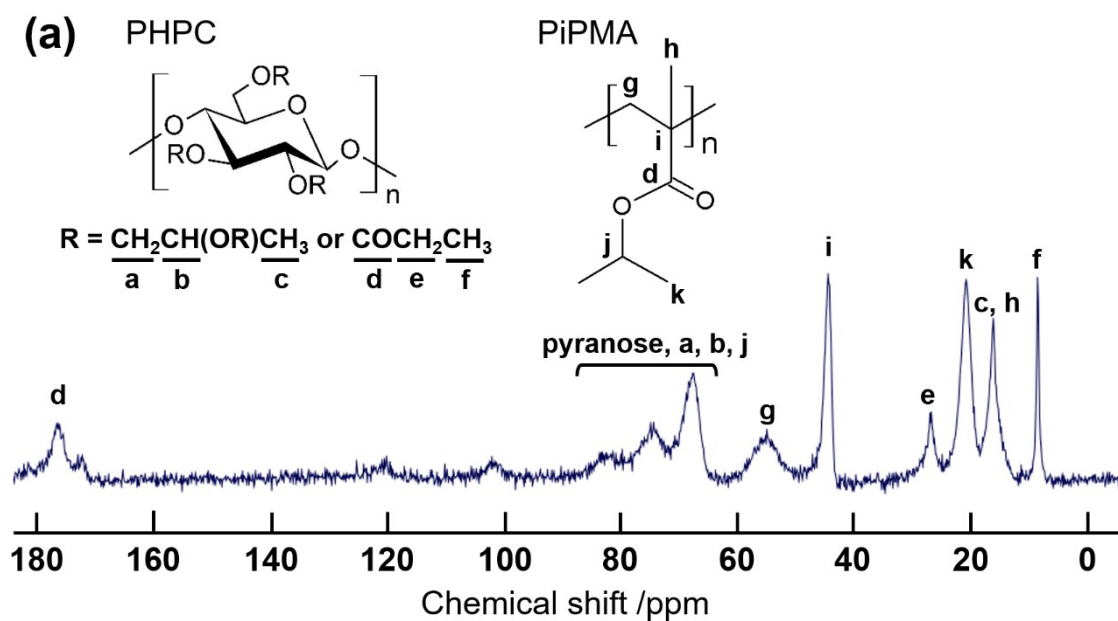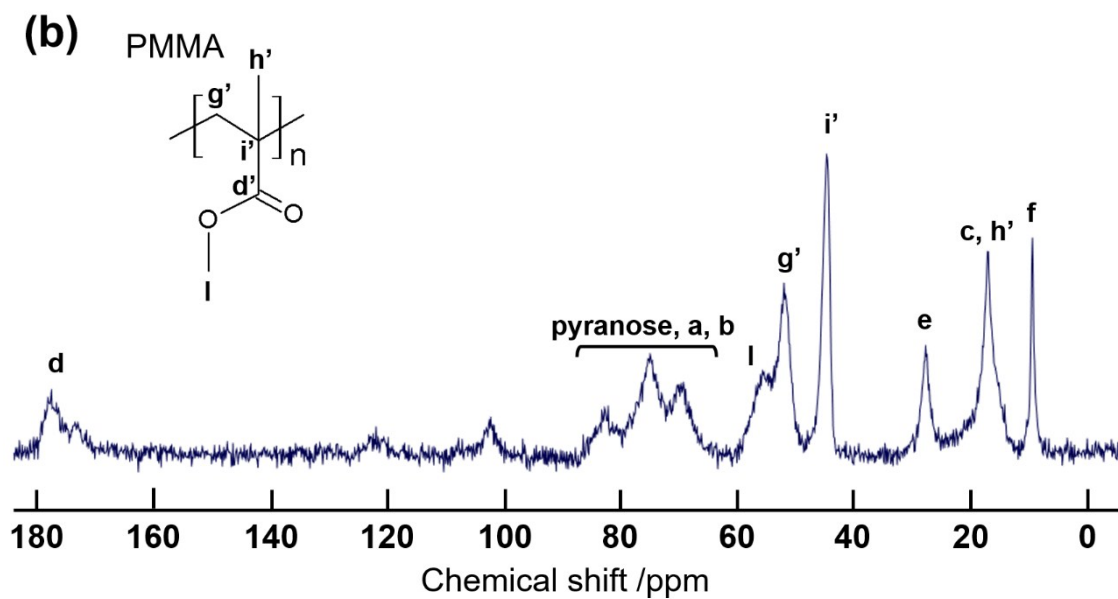

**Figure S3** Solid-state  $^{13}\text{C}$  CP/MAS NMR spectra of 76-wt% (a) PHPC/PiPMA, (b) PHPC/PMMA, and (c) PHPC/PACMO films.

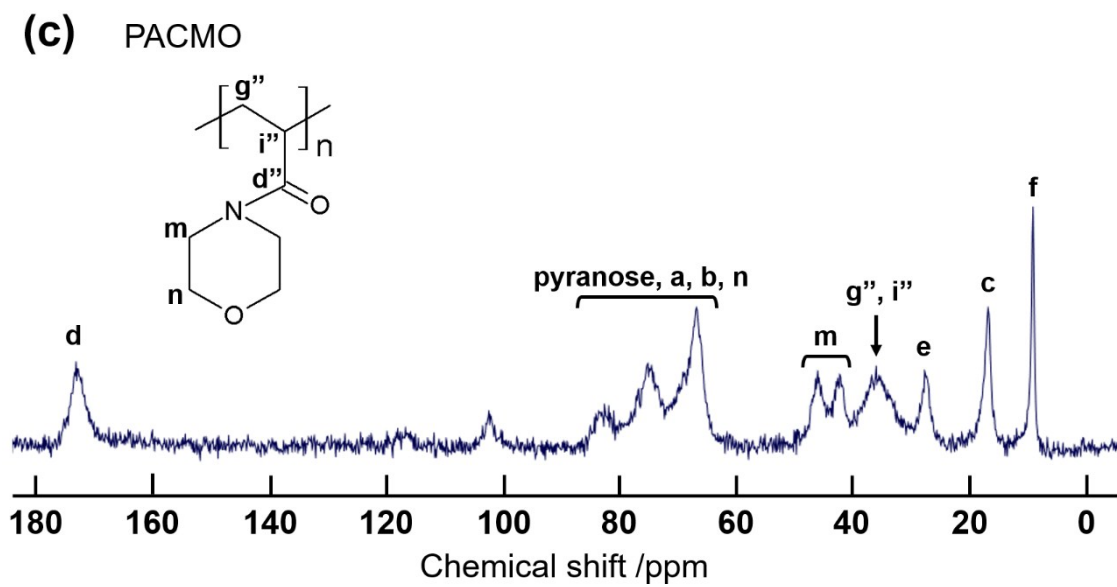

**Figure S3** (Continued).

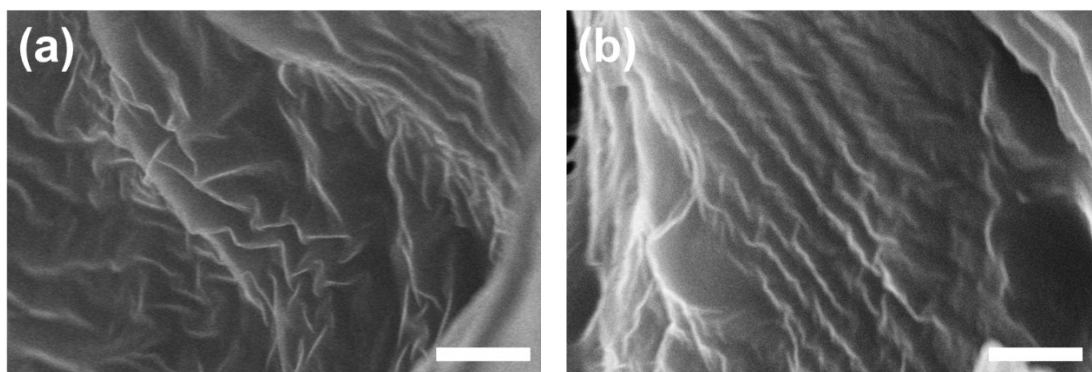

**Figure S4** SEM images of fracture surface morphologies of 76 wt% (a) PHPC/PiPMA and (b) PHPC/PACMO films. Scale bar denotes 1 μm.

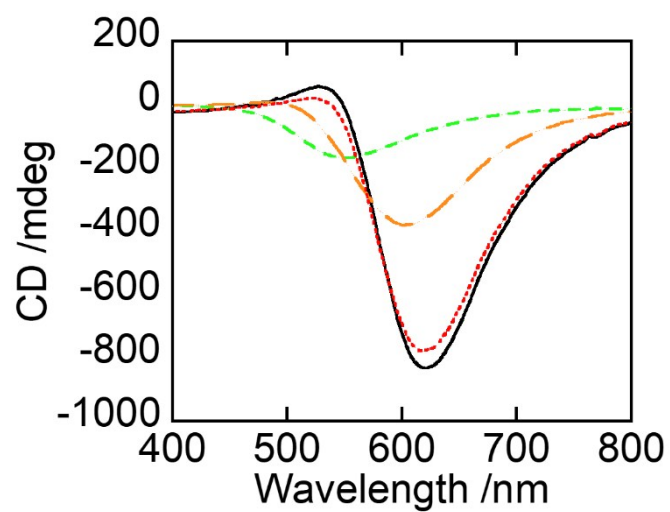

**Figure S5** CD spectra of 76 wt% PHPC/PACMO film after the compression at 30°C and subsequent heat treatment at 100°C for 0 s (---), 5 s (---), and 10 s (.....) with the spectrum of the as-polymerized one (—).
